# Supplementary material for: U-Shaped Relation between Plasma Oxytocin Levels and Behavior in the Trust Game
Source: PubMed Central journal article supplement (PMC3515439; doi:10.1371/journal.pone.0051095), 2012-12-05
Supplement: pone.0051095.s001.pdf [file pone.0051095.s001.pdf]

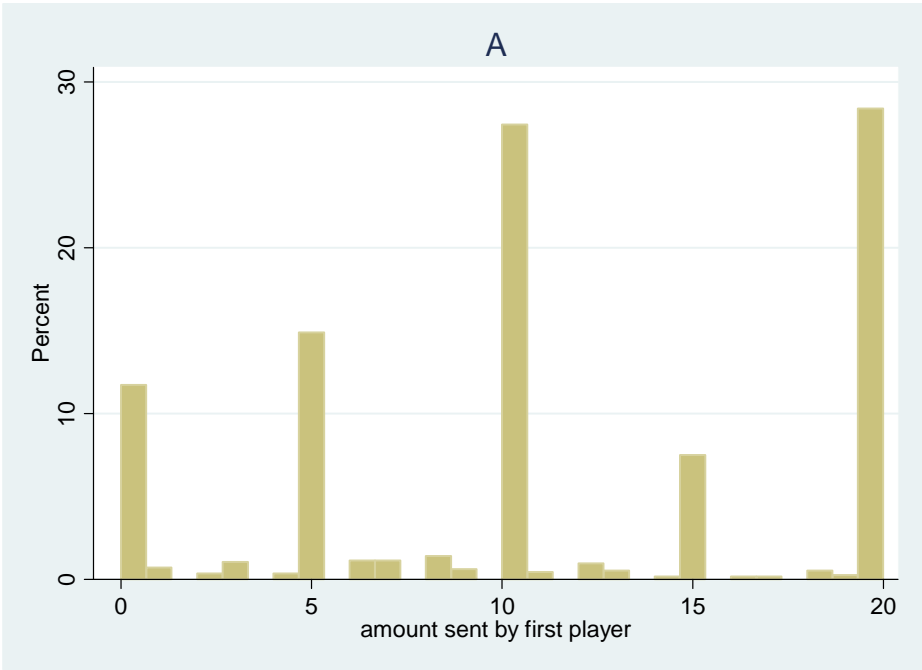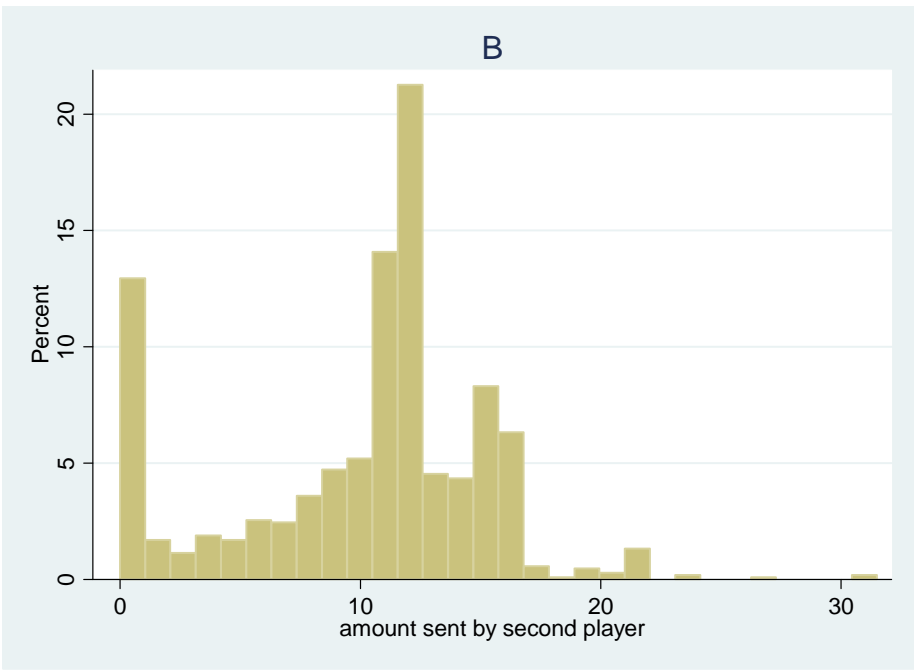

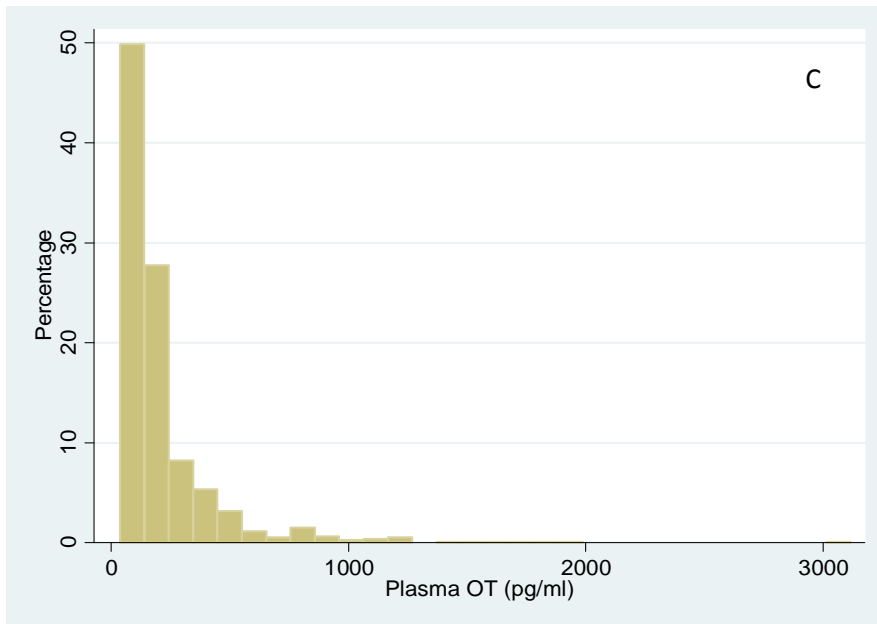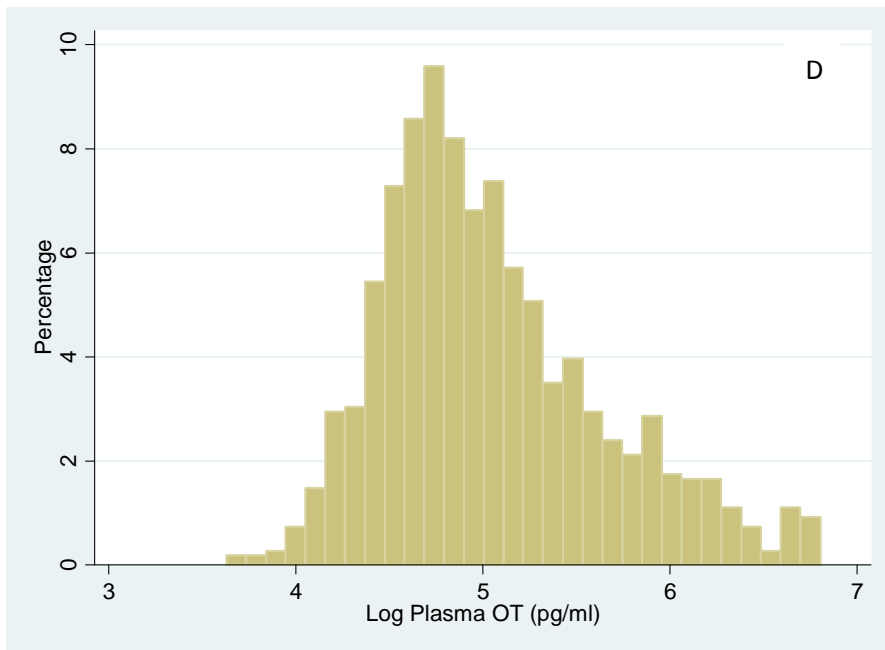

Figure S1. Distribution of trust behaviors and plasma oxytocin. (A) Distribution of the amount sent by the first player; (B) Distribution of the average amount returned by the second player; (C) Distribution of level of oxytocin; (D) Distribution of log level of oxytocin without outliers.
